# Supplementary material
Source: Royal Society of Chemistry journal article supplement (doi:10.1039/d6ta02103d)
Supplement: d6ta02103d1.pdf [file d6ta02103d1.pdf]

## Supplementary Information

### **Amorphous iron vanadate positive electrode enabling fast pseudocapacitive sodium-ion storage**

Xiaoqing Chang<sup>†</sup>, Dafu Tang<sup>†</sup>, Sicheng Fan, Guiyang Gao, Qiulong Wei\*

State Key Laboratory of Physical Chemistry of Solid Surfaces, Fujian Key Laboratory of Surface and Interface Engineering for High Performance Materials, College of Materials, Xiamen University, Xiamen 361005, China

\*E-mail: qlwei@xmu.edu.cn

## Experimental Section

### Materials synthesis

Amorphous iron vanadate (*a*-FVO) was synthesized using the previously reported method.<sup>1</sup> 2 mmol of iron (II) acetylacetonate and 2, 4 or 8 mmol of vanadyl acetylacetonate were added into 70 mL ethylene glycol solution. The mixture was stirred for 24 h to form a uniform solution at room temperature, and then transferred into a 100 mL Teflon-lined stainless-steel autoclave and held at 150 °C for 24 h. After the solution cooled to room temperature, the precipitate was collected by centrifugation and washed alternately with deionized water and ethanol for three times. The *a*-FVO powder was obtained after being dried at 80 °C under vacuum overnight followed by annealing treatment at 250 °C for 2 h in air to remove impurities. The crystalline F1V2O was obtained through annealing treatment at 500 °C for 2 h in air.

### Material characterization

Inductively coupled plasma optical emission spectroscopy (ICP-OES) measurements were conducted on Thermo SCIENTIFIC iCAP7400. Powder X-ray diffraction (XRD) patterns were recorded on a Bruker D8 Advance X-ray diffractometer (Cu K $\alpha$  radiation,  $\lambda=1.54056$  Å). Raman spectroscopy were performed using a laser wavelength of 532 nm to acquire data in the high-resolution Raman spectrometer (HORIBA HR Evolution). Brunauer–Emmett–Teller (BET) specific surface area was measured via nitrogen sorption isotherms (Micromeritics Tristar 3020) at 77 K after degassing under vacuum at 120 °C for 6 h. Scanning electron microscopy (SEM) images and Energy Dispersive Spectroscopy (EDS) elemental mappings were collected on a Zeiss Sigma 300. For ex situ XRD and Raman spectroscopy characterizations, the coin cells that reached the required states were disassembled in an Ar-filled glove box, and the electrodes were washed with diglyme and then tested.

### Electrode preparation

The *a*-FVO electrodes were prepared by mixing 85 wt.% the as-synthesized *a*-FVO powder, 10 wt.% Ketjet black (EC-600JD, Nouryon), and 5 wt.% polyvinylidene fluoride (PVDF, Arkema) in N-methylpyrrolidone (NMP, >99%, Acmecc) solution to form a slurry and then

coated onto an Al foil using doctor blading. The mass loading of active materials is controlled at  $\sim 2.5 \text{ mg cm}^{-2}$ . The electrodes were dried at  $120 \text{ }^\circ\text{C}$  for 12 h under vacuum and cut into 12 mm diameter discs using a punching machine.

### **Electrochemical measurements**

Coin cells (CR2032) were assembled in an Ar-filled glove box with  $\text{O}_2 < 0.1 \text{ ppm}$  and  $\text{H}_2\text{O} < 0.1 \text{ ppm}$ . A sodium metal disk was used as the counter and reference electrode. A Celgard-2325 membrane was used as separator. 1 M  $\text{NaPF}_6$  in diglyme (80  $\mu\text{L}$ ,  $>99.7\%$ , DuoDuo Chemical Technology Co.) used as electrolyte. The cyclic voltammetry (CV) and galvanostatic charge and discharge measurements were measured by the electrochemical workstation (Bio-Logic VSP) and NEWARE battery test system (CT-9008), respectively. Electrochemical impedance spectroscopy (EIS) measurements were conducted on the Bio-Logic VSP potentiostat by a potentiostatic method with an applied amplitude of 10 mV in the range of 200 kHz to 10 mHz. The galvanostatic intermittent titration technique (GITT) was performed with a constant current discharge at  $0.02 \text{ A g}^{-1}$  for 10 min followed by relaxation for 1.5 h on the NEWARE Battery Test System.

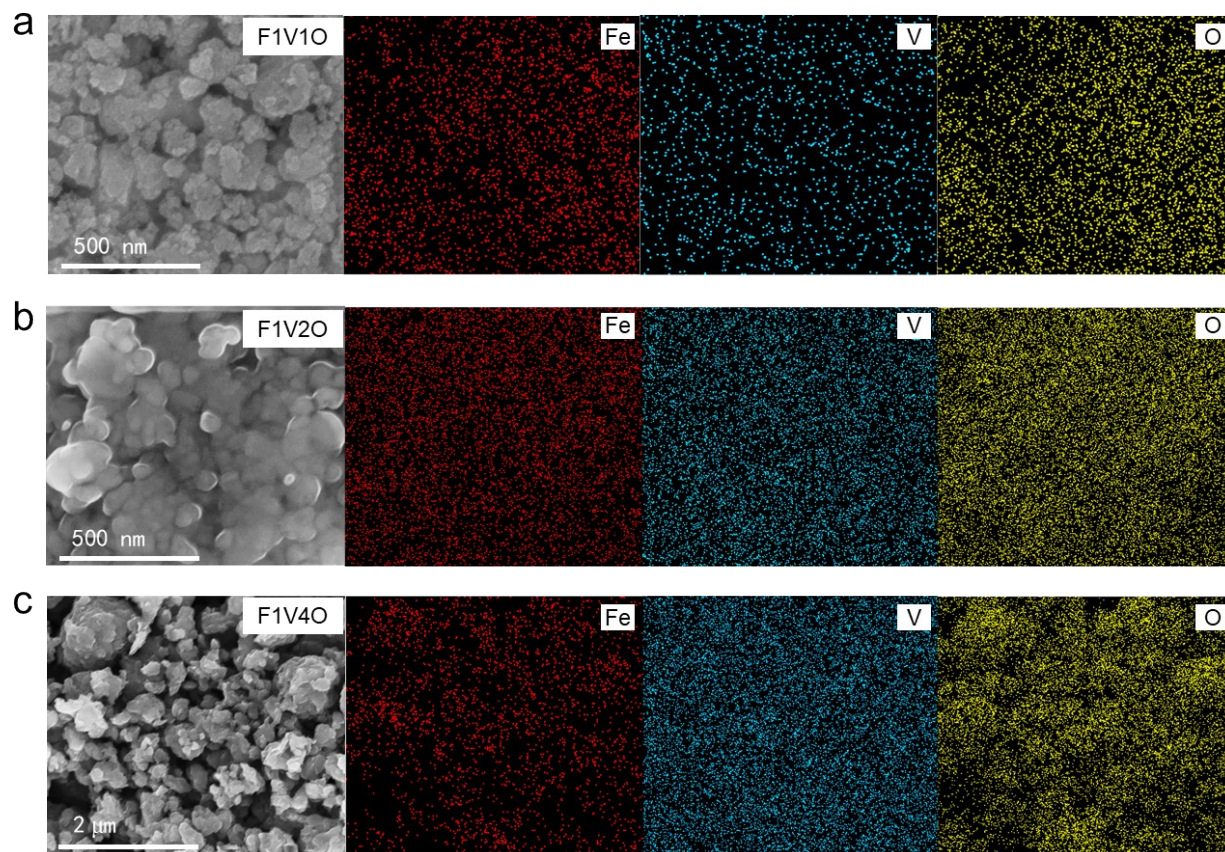

**Fig. S1** SEM images and element mappings of (a) F1V1O, (b) F1V2O and (c) F1V4O samples.

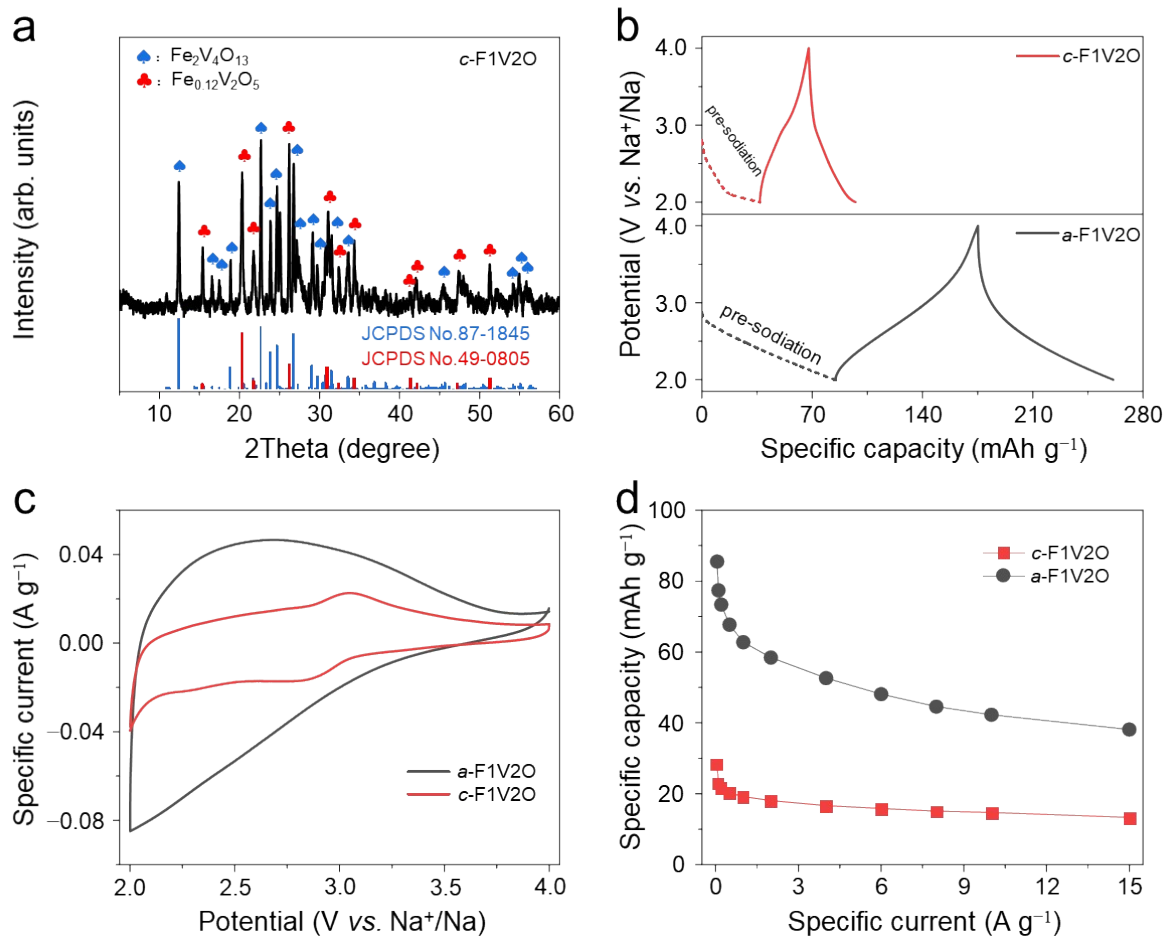

**Fig. S2** (a) XRD pattern of the synthesized *c*-F1V2O sample, (b) GCD curves for initial 2 cycles, (c) CV curves for the 5th cycle and (d) rate performance of *a*-F1V2O and *c*-F1V2O positive electrodes.

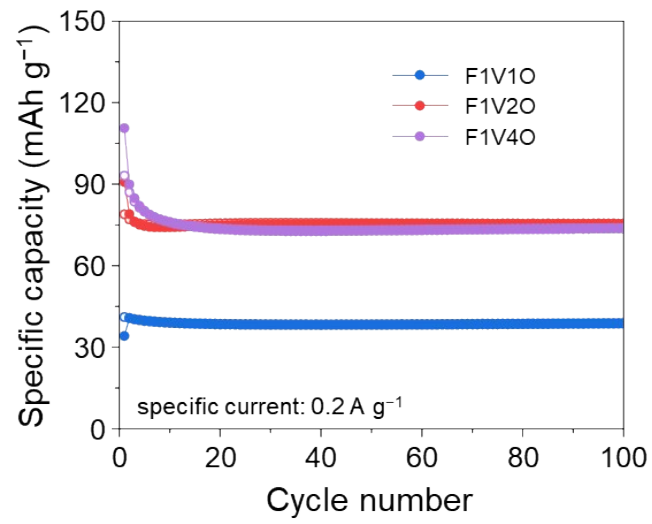

**Fig. S3** Cycling performance of the three *a*-FVO positive electrodes at 0.2 A g<sup>-1</sup>.

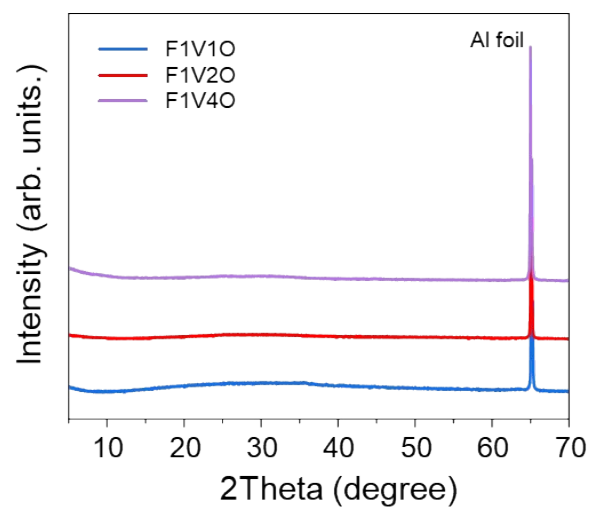

**Fig. S4** XRD patterns of three *a*-FVO positive electrodes after 1000 cycles at 1 A g<sup>-1</sup>.

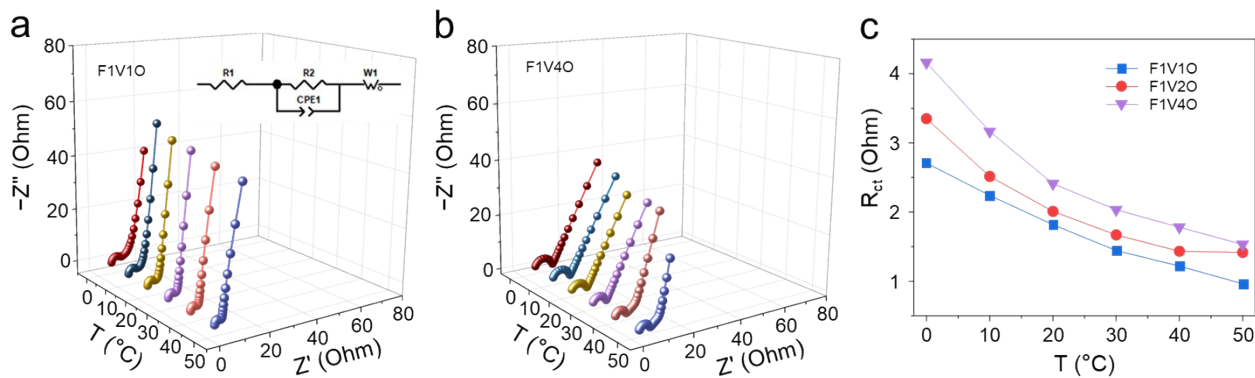

**Fig. S5** Nyquist plots of the (a) F1V1O and (b) F1V4O electrodes at various temperatures (Insert is the equivalent circuit model). (c) Fitted  $R_{ct}$  value of the three *a*-FVO electrodes at various temperatures.

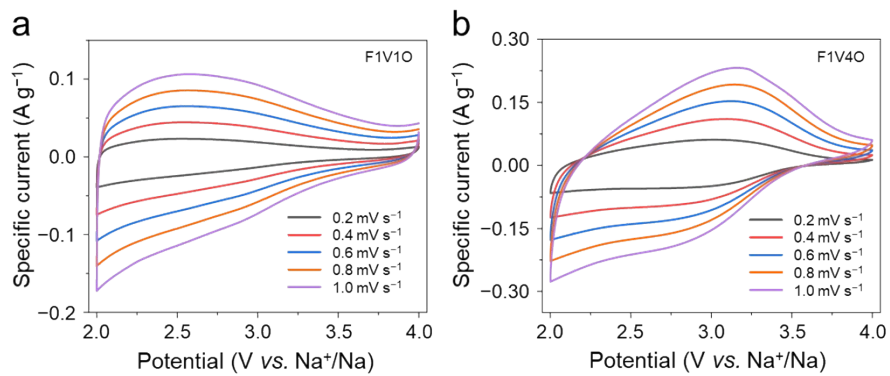

**Fig. S6** CV curves of the (a) F1V1O and (b) F1V4O electrodes at various sweep rates.

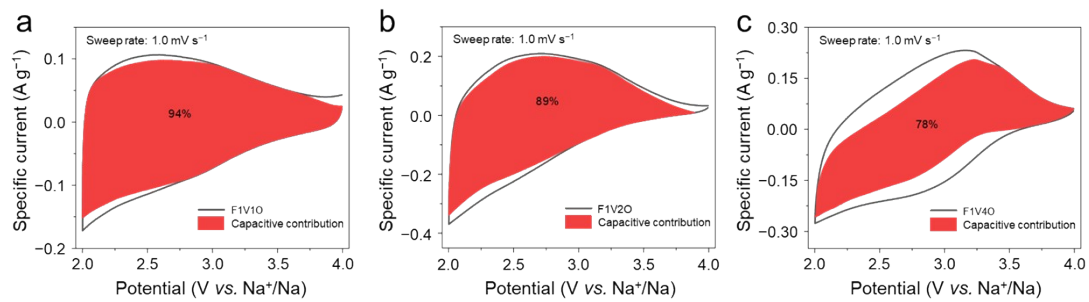

**Fig. S7** Capacitive contributions to sodium-ion storage for the (a) F1V1O, (b) F1V2O and (c) F1V4O electrodes at  $1 \text{ mV s}^{-1}$ .

**Table S1** The initial Coulombic efficiency of the three *a*-FVO positive electrodes.

| Positive electrode | Initial desodiation capacity at 0.05 A g <sup>-1</sup> (mAh g <sup>-1</sup> ) | Initial sodiation capacity at 0.05 A g <sup>-1</sup> (mAh g <sup>-1</sup> ) | Initial Coulombic efficiency (%) |
|--------------------|-------------------------------------------------------------------------------|-----------------------------------------------------------------------------|----------------------------------|
| F1V1O              | 38.6                                                                          | 42.4                                                                        | 109.9                            |
| F1V2O              | 90.4                                                                          | 85.9                                                                        | 95.0                             |
| F1V4O              | 108.4                                                                         | 101.1                                                                       | 93.3                             |

**Table S2.** The electrochemical properties of pseudocapacitive positive electrodes reported previously.

| Positive electrodes  | Mass loading (mg cm <sup>-2</sup> ) | Potential window (V) | Specific capacity (xx mAh g <sup>-1</sup> at xx A g <sup>-1</sup> ) | Rate performance (xx mAh g <sup>-1</sup> at xx A g <sup>-1</sup> ) | Cycle life                                        | Ref.      |
|----------------------|-------------------------------------|----------------------|---------------------------------------------------------------------|--------------------------------------------------------------------|---------------------------------------------------|-----------|
| F1V2O                | 1.5–2                               | 2–4                  | 85 at 0.05                                                          | 38.2 at 15                                                         | 105% after 1000 cycles at 1 A g <sup>-1</sup>     | This work |
| VOPO <sub>4</sub> NS | 1                                   | 2.5–4.3              | 114 at 0.08                                                         | 48 at 1.67                                                         | 73% after 500 cycles at 0.83 A g <sup>-1</sup>    | 2         |
| PB-A                 | –                                   | 2–4                  | 92 at 0.5 C                                                         | 55 at 3                                                            | 70% after 1000 cycles at 1 C.                     | 3         |
| LV-CuHCF             | 1–2                                 | 2–4                  | 86 at 0.08                                                          | 41 at 8                                                            | 56% after 1000 cycles at 0.8 A g <sup>-1</sup>    | 4         |
| K-MDC(0)             | 2–4                                 | 2.0–4.2              | 70 at 0.1                                                           | 40 at 10                                                           | 82% after 5000 cycles at 2 A g <sup>-1</sup>      | 5         |
| IE-NMO10             | 1–2                                 | 2–4                  | 94 at 0.06                                                          | 45 at 2.4                                                          | 98.1% after 1000 cycles at 2.4 A g <sup>-1</sup>  | 6         |
| SOPC-10              | 2                                   | 1.2–4.2              | 87 at 0.05                                                          | 50 at 10                                                           | 25% after 2500 cycles at 1 A g <sup>-1</sup>      | 7         |
| NVO-0.01Nb           | –                                   | 1.5–4.0              | 85 at 0.03                                                          | 30 at 0.24                                                         | 40% after 500 cycles at 0.12 A g <sup>-1</sup>    | 8         |
| NMZP@C-rGO           | 1.6–1.8                             | 2.5–4.3              | 100 at 0.05                                                         | 50.9 at 5                                                          | 97.4% after 1500 cycles at 0.02 A g <sup>-1</sup> | 9         |

## Reference

- 1 Y. Jiang, F. Wu, Z. Ye, C. Li, Y. Zhang, L. Li, M. Xie and R. Chen, *Adv. Funct. Mater.*, 2021, **31**, 2009756.
- 2 Y. Zhu, L. Peng, D. Chen and G. Yu, *Nano Lett.*, 2016, **16**, 742–747.
- 3 Y. Chen, H. J. Woo, S. A. F. Syed Mohd Fadzil, W. Tan, F. Wang and A. K. Mohd Arof, *ACS Appl. Nano Mater.*, 2022, **5**, 4833–4840.
- 4 B. Wang, S. Liu, W. Sun, Y. Tang, H. Pan, M. Yan and Y. Jiang, *ChemSusChem*, 2019, **12**, 2415–2420.
- 5 Y. M. Jung, J. H. Choi, D. W. Kim and J. K. Kang, *Adv. Sci.*, 2023, **10**, 2301160.
- 6 Y. Cao, M. Xiao, W. Dong, T. Cai, H. Bi and F. Huang, *Sci. China Mater.*, 2023, **66**, 3810–3816.
- 7 W. Ren, Y. Xiong, L. Yang, Y. Zhang, H. Liang, C. Zhu, X. Wang, J. Chen, W. Tian and M. Huang, *Carbon*, 2025, **238**, 120245.
- 8 L. Zhu, C. Pan, Q. Han, Y. Miao, X. Yang, L. Xie and X. Cao, *J. Alloys Compd.*, 2022, **890**, 161885.
- 9 X. Ma, X. Wu, Y. Liu, W. Wu, Z. Pan and P. K. Shen, *ACS Appl. Mater. Interfaces*, 2021, **13**, 21390–21400.
